# Supplementary material for: CCHamide-2 Signaling Regulates Food Intake and Metabolism in Gryllus bimaculatus
Source: MDPI journal article supplement (doi:10.3390/insects13040324), 2022-03-25
Supplement: s1 [file s1]

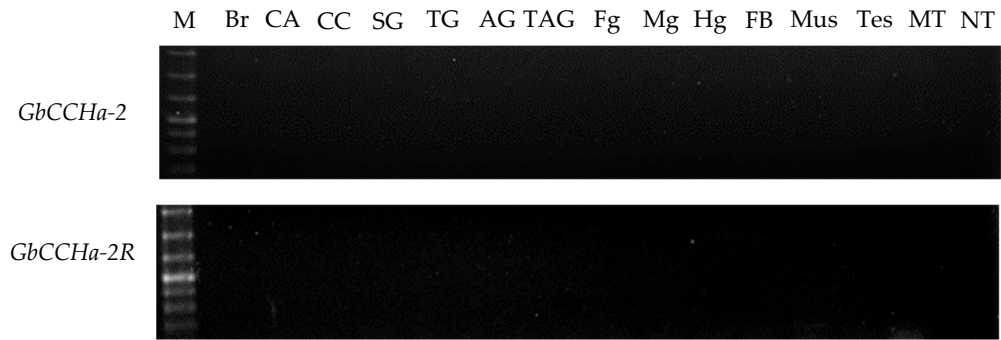

Figure S1. No-RT negative control and no-template control of RT-PCR. Br, brain; CA, corpora allata; CC, corpora cardiaca; SG, subesophageal ganglion; TG, thoracic ganglia; AG, abdominal ganglia; TAG, terminal abdominal ganglion; Fg, foregut; Mg, midgut; Hg, hindgut; FB, fat body; Mus, muscle; Tes, testis; MT, Malpighian tubules. M, marker. NT, no-template control.
